# Supplementary figures and images for: Anti-inflammatory constituents isolated from the flowers of Hosta plantaginea via suppression of the NF-κB signaling pathway in LPS-stimulated RAW 264.7 macrophages
Source: Royal Society of Chemistry journal article supplement (doi:10.1039/d2ra07623c), 2023-01-01

**Figure 5A**

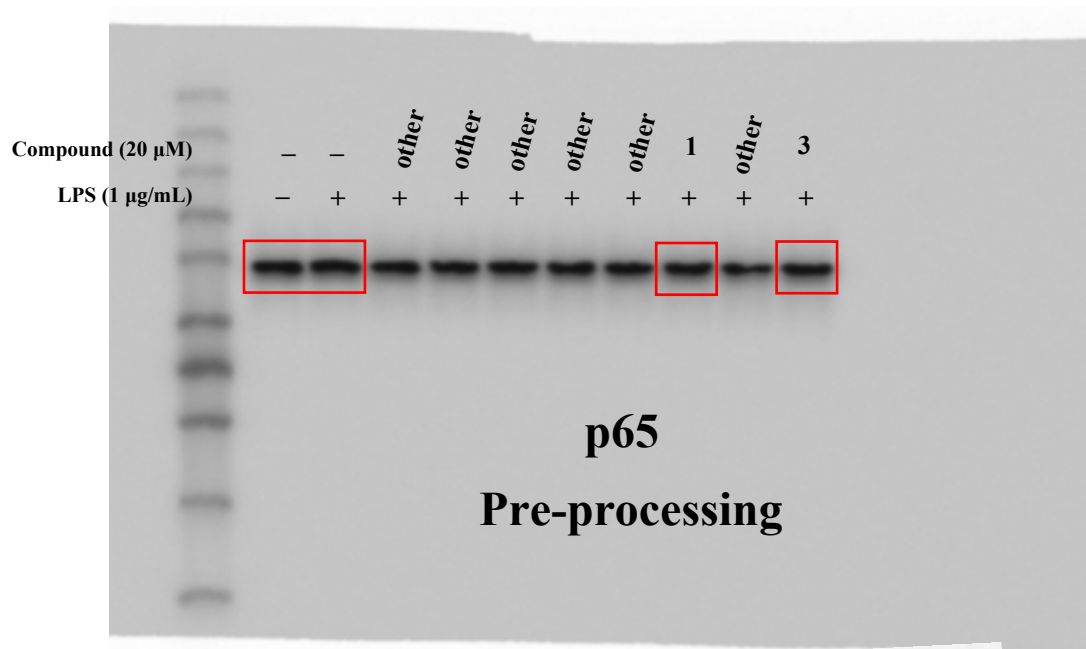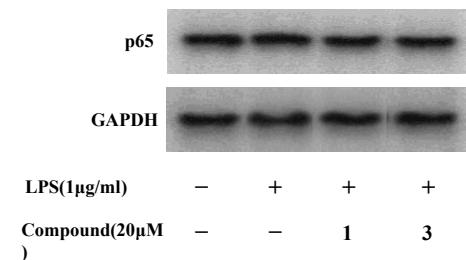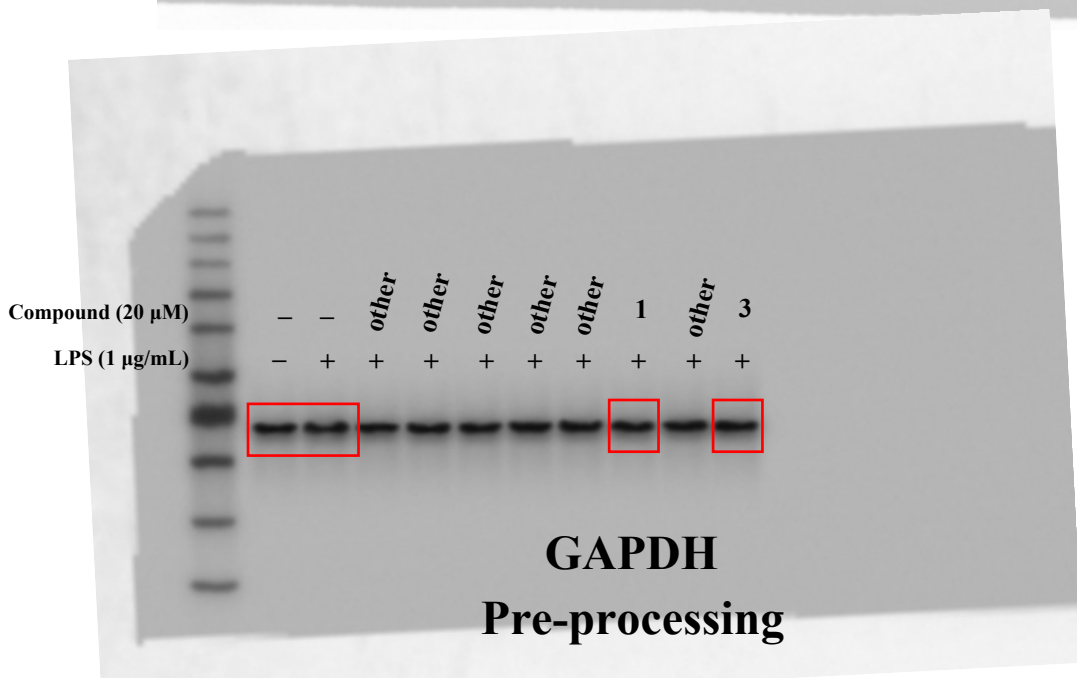

**Figure 5B**

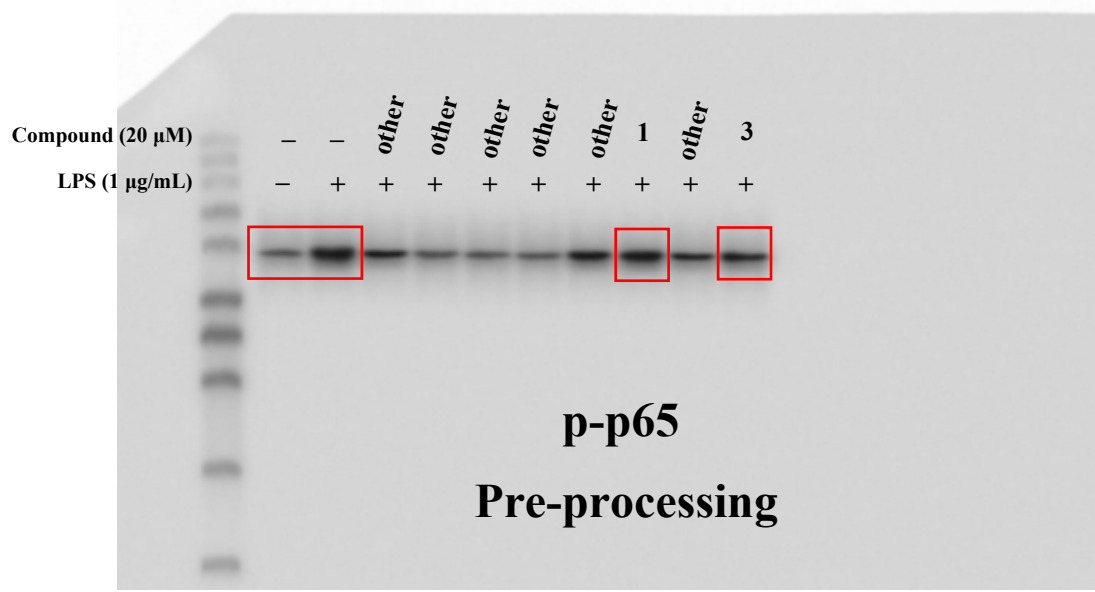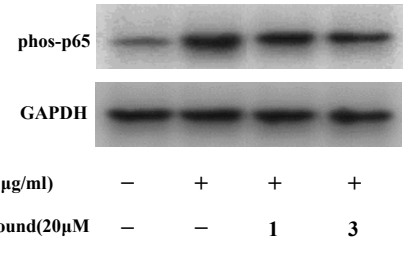

**p-p65 and GAPDH**  
**Post-processing**

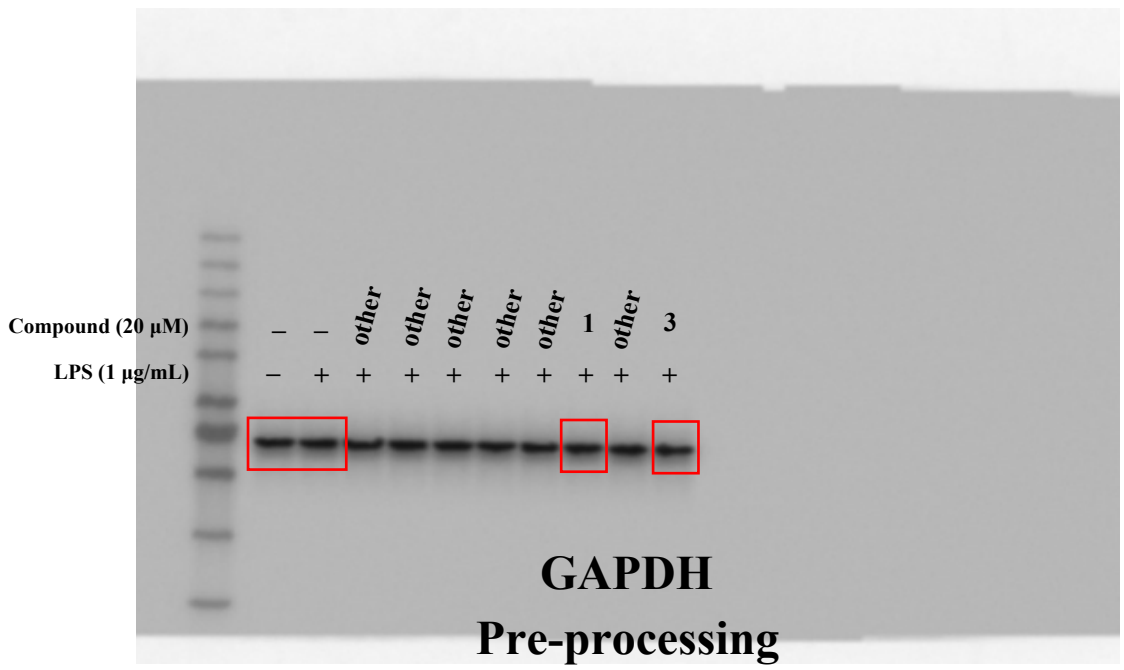

Supplement: d2ra07623c2.pdf [file d2ra07623c2.pdf]
